# Supplementary material for: Identification and Clinical Characterization of Adult Patients with Multigenerational Diabetes Mellitus
Source: PubMed Central journal article supplement (PMC4545999; doi:10.1371/journal.pone.0135855), 2015-08-19

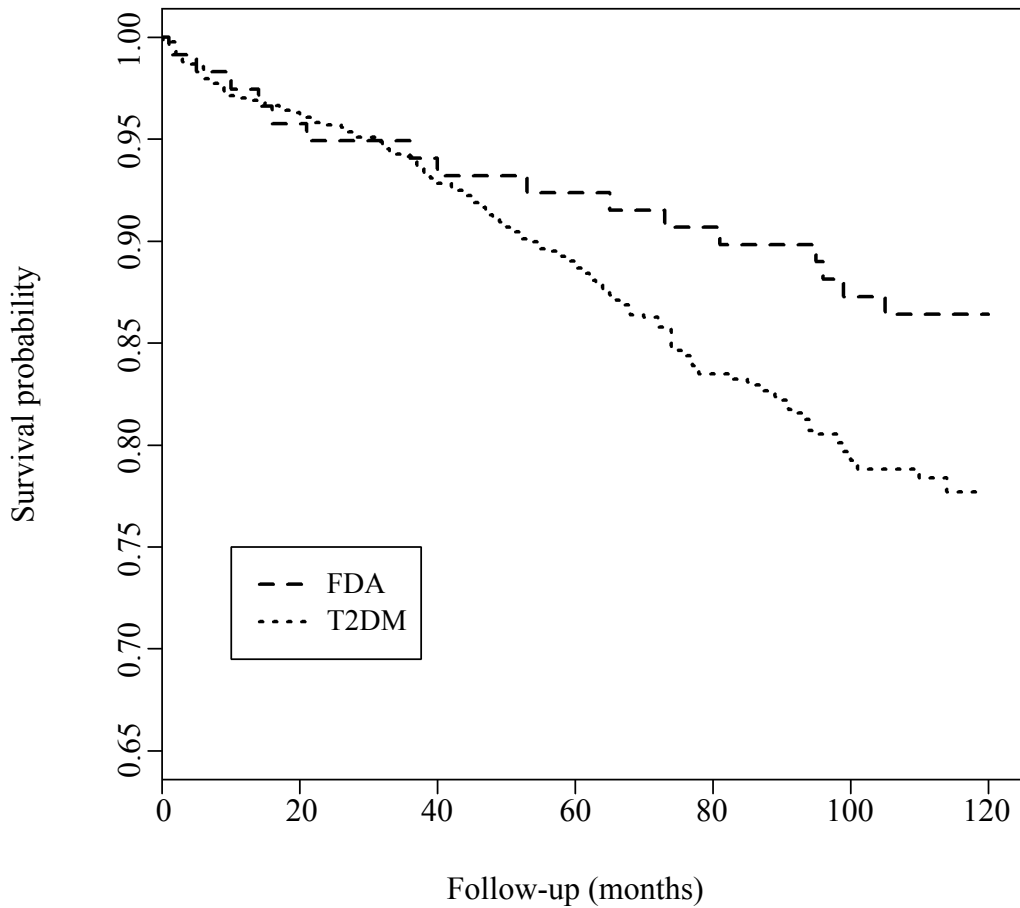

Supplement: pone.0135855.s001.pdf [file pone.0135855.s001.pdf]
